# Supplementary material for: Association of serum levels of vascular endothelial growth factor and thrombospondin-1 to body mass index in polycystic ovary syndrome: a case-control study
Source: PubMed Central journal article supplement — Obstet Gynecol Sci. 2019 Oct 14;62(6):420–8. doi: 10.5468/ogs.2019.62.6.420 (PMC6856488; doi:10.5468/ogs.2019.62.6.420), 2019-10-14
Supplement: ogs-62-420-s001.pdf [file ogs-62-420-s001.pdf]

## Supplementary Data 1. Selection of model

(A)

The first motivation of the study analysis is to use the principal component analysis (PCA) for model selection (Table a).

**Table a:** KMO and Bartlett's Test results and Rotated Component Matrix

| Kaiser-Meyer-Olkin Measure of Sampling Adequacy. |       |        |       |                  |       |       |       |         |        |      |        |      | 0.71     |
|--------------------------------------------------|-------|--------|-------|------------------|-------|-------|-------|---------|--------|------|--------|------|----------|
| Bartlett's Test of Sphericity                    |       |        |       |                  |       |       |       |         |        |      |        |      | <0.001   |
| Factors                                          | BMI   | Systol | FBS   | Total Cholestrol | TG    | HDL   | LDL   | Insulin | HOMAIR | TSP1 | Leptin | VEGF | LAPindex |
| 1                                                | 0.817 | 0.373  | 0.307 | 0.711            | 0.819 | -0.49 | 0.726 | 0.773   | 0.779  |      |        |      | 0.884    |
| 2                                                |       |        |       |                  |       |       |       |         |        | 0.89 | 0.88   | 0.71 |          |

Two factors were extracted with PCA. TSP-1, Leptin, and VEGF were collected in the second factor and other variables were in collected in the first factor. With this approach, we could fit two logistic regression models. The full models show as follow,

$$\begin{aligned} \text{logistic (PCOS)} &= \beta_0 + \beta_1 \text{BMI} + \beta_2 \text{systol} + \beta_3 \text{TGC} + \beta_4 \text{TG} \\ &+ \beta_5 \text{HDL} + \beta_6 \text{LDL} + \beta_7 \text{insulin} + \beta_8 \text{HOMA} + \beta_9 \text{LAP} \end{aligned} \quad (1)$$

$$\text{logistic (PCOS)} = \beta_0 + \beta_1 \text{TSP1} + \beta_2 \text{Leptin} + \beta_3 \text{VEGF} \quad (2)$$

We added interaction between variables in models and used forward method for selection of final model. Finally best model is selected as follow:

$$\text{logistic (PCOS)} = \beta_0 + \beta_1 \text{BMI} + \beta_2 \text{TSP1} + \beta_3 \text{VEGF} + \beta_4 \text{Leptin} \times \text{TSP1}$$

(B)

With these examples, we exhibited the final model for prediction of PCOS probability.

Example 1:

Consider the patient with BMI=20, TSP-1=28.43, VEGF=240.8 and Leptin=0.423

$$\begin{aligned} \text{logit} \left( \frac{P(\text{PCOS})}{1 - P(\text{PCOS})} \right) &= -6.752 + (0.455 * 20) + (-0.1 * 28.43) + (0.004 * 240.8) + (0.014 * 28.43 * 0.423) \\ &= -24.9504 \end{aligned}$$

$$P(\text{PCOS}) = \frac{e^{-24.9504}}{1 + e^{-24.9504}} = 0.66$$

This means that the probability of PCOS for this patient is 0.66; the characteristics of this person were as a real patient in PCOS group of our manuscript.

Example 2:

Consider the another person with BMI=20.43, TSP-1=60.1, VEGF=492.8 and Leptin=0.7,

$$\begin{aligned} \text{logit} \left( \frac{P(\text{PCOS})}{1 - P(\text{PCOS})} \right) &= -6.752 + (0.455 * 20.43) + (-0.1 * 60.1) + (0.004 * 492.8) + (0.014 * 60.1 * 0.7) \\ &= -0.90617 \end{aligned}$$

$$P(\text{PCOS}) = \frac{e^{-0.90617}}{1 + e^{-0.90617}} = 0.28$$

This means that the probability of PCOS for this patient is 0.28; this probability indicates that the person is Negative-PCOS; the characteristics of this person are as a real person in control group of our manuscript.

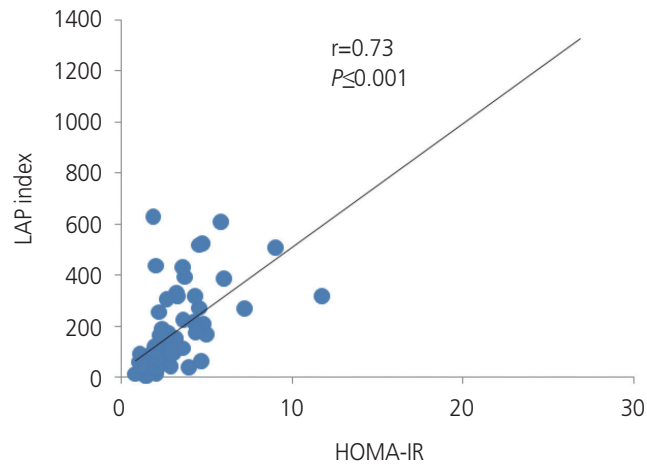

**Figure A.** Correlation between HOMA-IR and LAP-index in cases and control group. HOMA, homeostasis model assessment; IR, insulin resistance; LAP, lipid accumulation product.
